# Supplementary material
Source: MDPI journal article supplement (https://www.mdpi.com/1424-8247/15/6/751)
Supplement: s1 [file s1]

# Supporting Information

## The Synthesis, Characterization, Molecular docking, and In Vitro Antitumour Activity of Benzothiazole Aniline (BTA) Conjugated Metal-Salen Complexes as Non-Platinum Chemotherapeutic Agents

Md. Kamrul Islam <sup>1</sup>, Seongmin Ha <sup>1</sup>, Ah-Rum Baek <sup>1</sup>, Byeong-Woo Yang <sup>1</sup>, Yeoun-Hee Kim <sup>2</sup>, Hyun-Jin Park <sup>2</sup>, Minsup Kim <sup>3</sup>, Sung-Wook Nam <sup>4</sup>, Gang-Ho Lee <sup>5</sup> and Yongmin Chang <sup>4,6,7,\*</sup>

<sup>1</sup> Institute of Biomedical Engineering Research, Kyungpook National University, 680, Gukchaebosang-ro, Jung-gu, Daegu 41944, Republic of Korea

<sup>2</sup> R&D Center, Etnova Therapeutics Corp., 124, Sagimakgol-ro, Jungwon-gu, Gyeonggi-do 13207, Republic of Korea

<sup>3</sup> InCerebro Drug Discovery Institute, Seoul 01811, Republic of Korea

<sup>4</sup> Department of Medical & Biological Engineering, Kyungpook National University, 80, Daehak-ro, Buk-gu, Daegu 41566, Republic of Korea

<sup>5</sup> Department of Chemistry, Kyungpook National University, 80, Daehak-ro, Buk-gu, Daegu 41566, Republic of Korea

<sup>6</sup> Department of Molecular Medicine, School of Medicine, Kyungpook National University, 680, Gukchaebosang-ro, Jung-gu, Daegu 41944, Republic of Korea

<sup>7</sup> Department of Radiology, Kyungpook National University Hospital, 130 Dongdeok-ro, Jung-gu, Daegu 41944, Republic of Korea

\* Correspondence: ychang@knu.ac.kr; Tel.: (+) 82-53-420-5471

# Table of contents

|     |                                                                                   |     |
|-----|-----------------------------------------------------------------------------------|-----|
| 1.  | <b>Figure S1.</b> $^1\text{H}$ NMR spectrum of compound <b>L</b> .                | S3  |
| 2.  | <b>Figure S2.</b> FTIR spectrum of compound <b>L</b> .                            | S3  |
| 3.  | <b>Figure S3.</b> High-resolution mass spectrum of compound <b>L</b> .            | S4  |
| 4.  | <b>Figure S4.</b> FTIR spectrum of compound <b>MnL</b> .                          | S4  |
| 5.  | <b>Figure S5.</b> ESI mass spectrum of compound <b>MnL</b> .                      | S5  |
| 6.  | <b>Figure S6.</b> FTIR spectrum of compound <b>FeL</b> .                          | S5  |
| 7.  | <b>Figure S7.</b> High-resolution mass spectrum of compound <b>FeL</b> .          | S6  |
| 8.  | <b>Figure S8.</b> FTIR spectrum of compound <b>CoL</b> .                          | S6  |
| 9.  | <b>Figure S9.</b> High-resolution mass spectrum of compound <b>CoL</b> .          | S7  |
| 10. | <b>Figure S10.</b> $^1\text{H}$ NMR spectrum of compound <b>NiL</b> .             | S7  |
| 11. | <b>Figure S11.</b> FTIR spectrum of compound <b>NiL</b> .                         | S8  |
| 12. | <b>Figure S12.</b> ESI mass spectrum of compound <b>NiL</b> .                     | S8  |
| 13. | <b>Figure S13.</b> FTIR spectrum of compound <b>CuL</b> .                         | S9  |
| 14. | <b>Figure S14.</b> High-resolution mass spectrum of compound <b>CuL</b> .         | S9  |
| 15. | <b>Figure S15.</b> $^1\text{H}$ NMR spectrum of compound <b>ZnL</b> .             | S10 |
| 16. | <b>Figure S16.</b> FTIR spectrum of compound <b>ZnL</b> .                         | S10 |
| 17. | <b>Figure S17.</b> ESI mass spectrum of compound <b>ZnL</b> .                     | S11 |
| 18. | <b>Figure S18.</b> Molecular docking of <b>L</b> , <b>MnL</b> , and BTA with DNA. | S11 |
| 19. | <b>Figure S19.</b> Molecular docking of <b>L</b> , <b>MnL</b> , and BTA with DNA. | S12 |

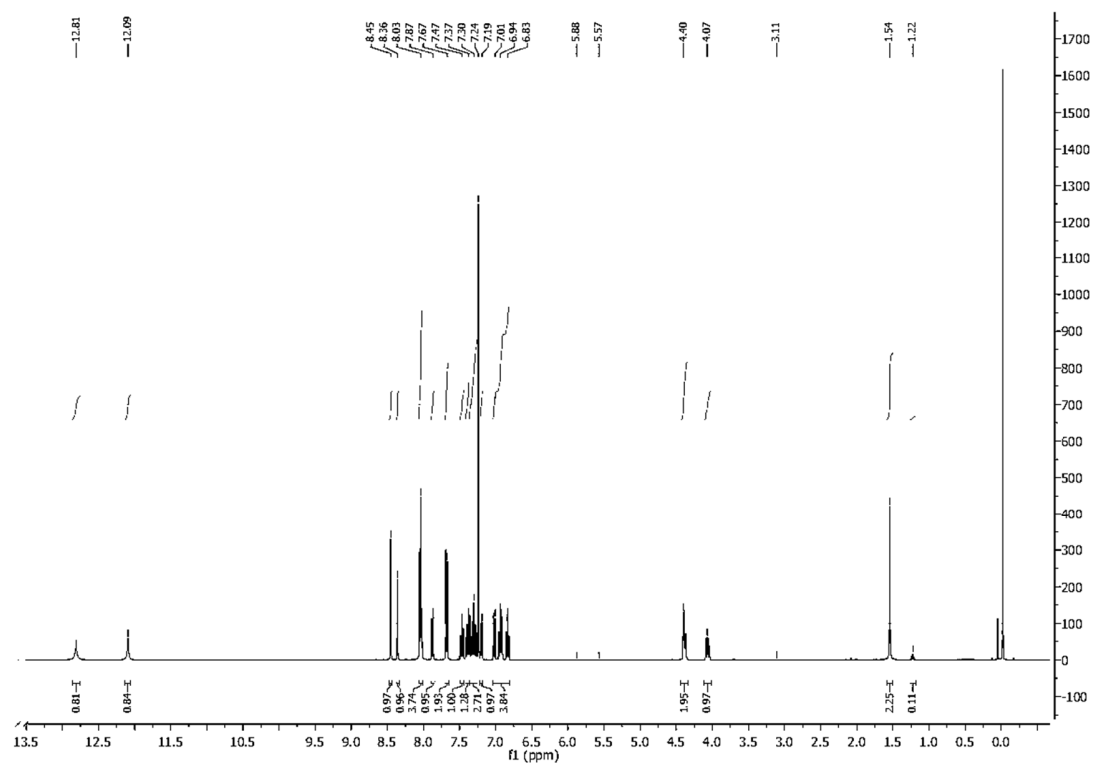

**Figure S1.** <sup>1</sup>H NMR spectrum of compound L.

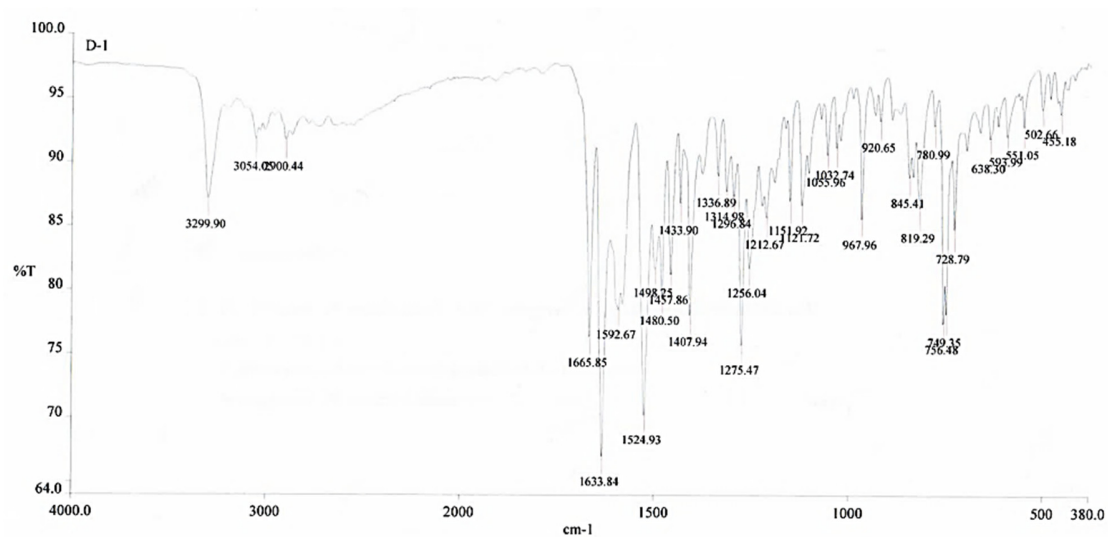

**Figure S2.** FT-IR spectrum of compound L.

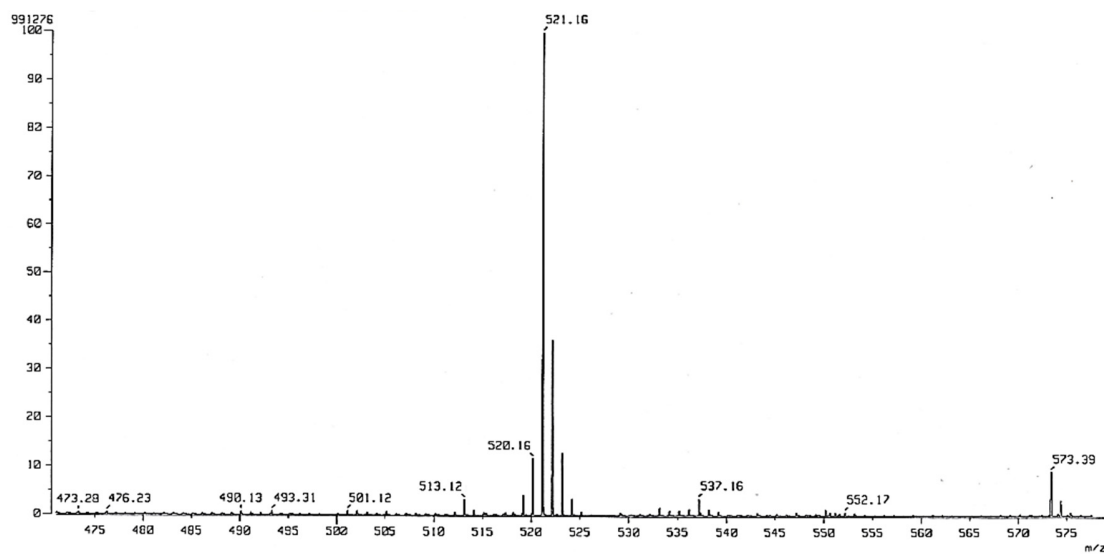

**Figure S3.** High-resolution FAB mass spectrum of compound **L**. Mass spectrum of main peak display parent ion ( $m/z$ ): calcd, 521.1647  $[M+H]^+$ ; found, 521.1649  $[M+H]^+$ .

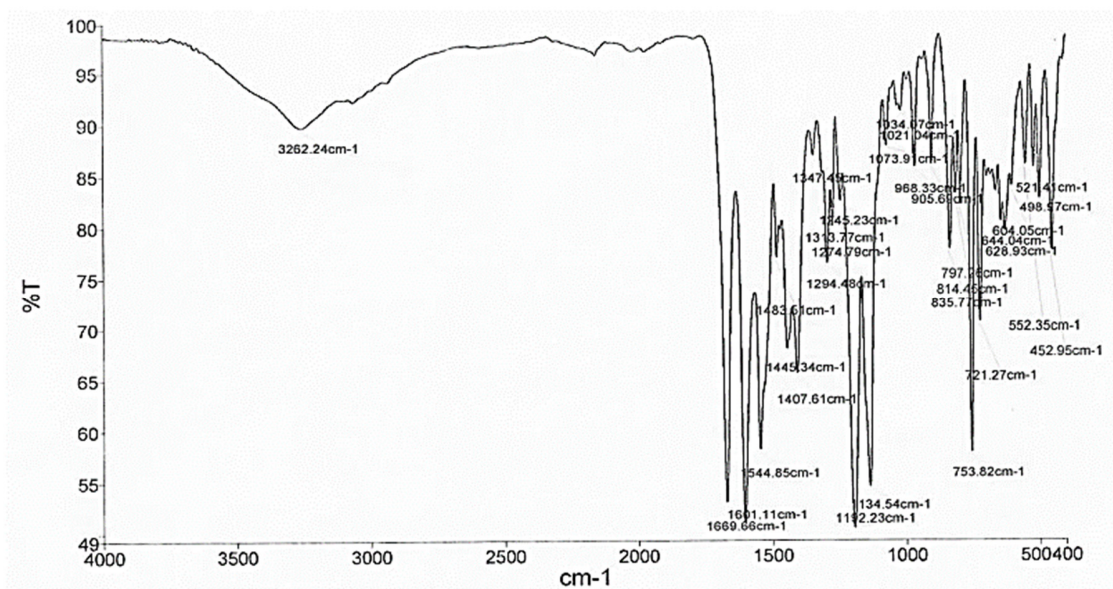

**Figure S4.** FTIR spectrum of compound **MnL**.

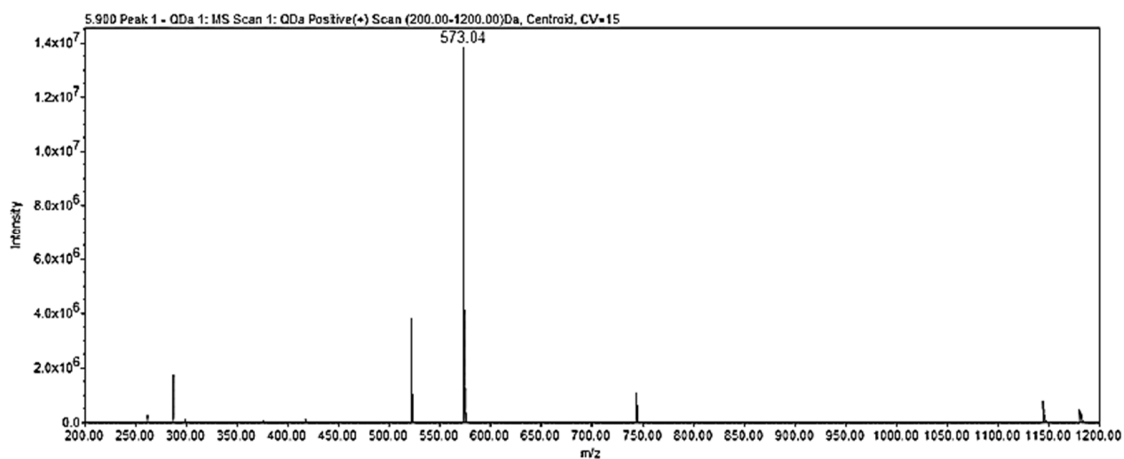

**Figure S5.** ESI-MS spectrum of compound **MnL**. Mass spectrum of main peak display parent ion (m/z): calcd, 573.07 [M]<sup>+</sup>; found, 573.04 [M]<sup>+</sup>.

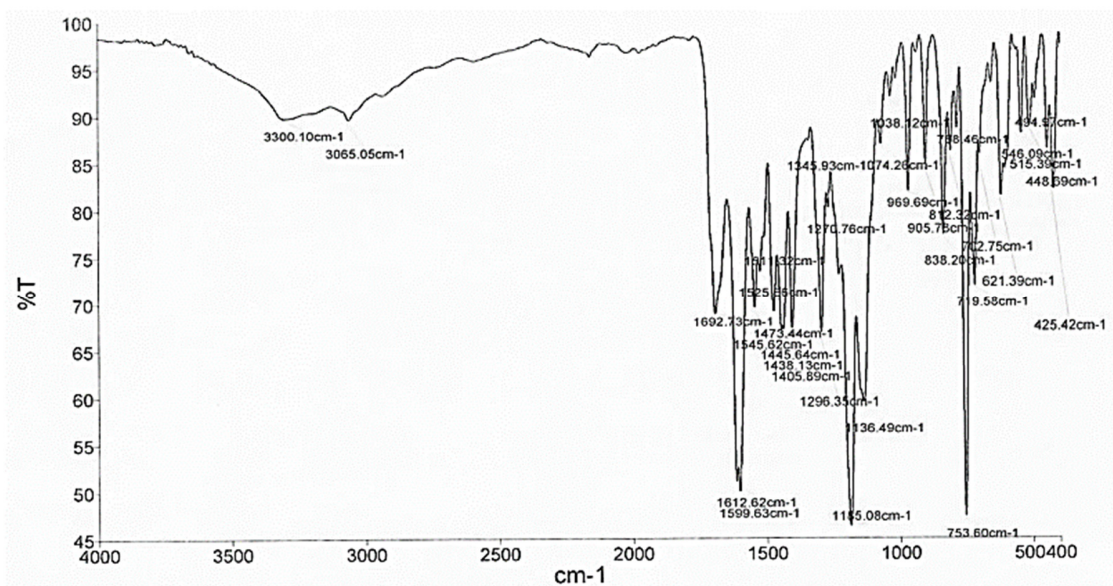

**Figure S6.** FTIR spectrum of compound **FeL**.

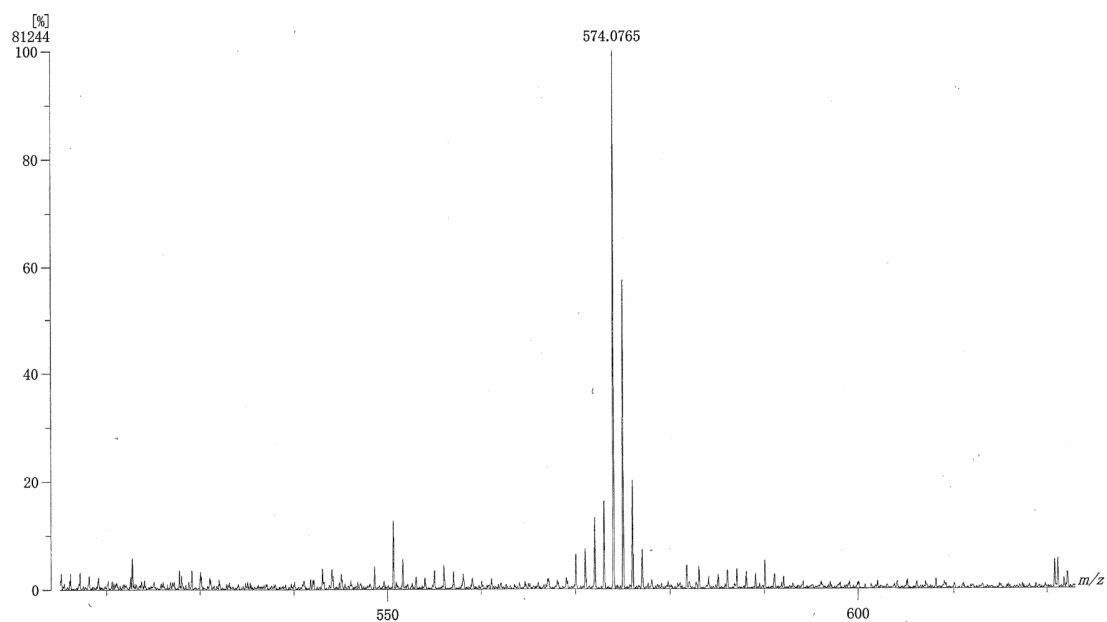

**Figure S7.** High-resolution FAB mass spectrum of compound FeL. Mass spectrum of main peak display parent ion ( $m/z$ ): calcd, 521.1647  $[M+H]^+$ ; found, 574.0765  $[M+H]^+$ .

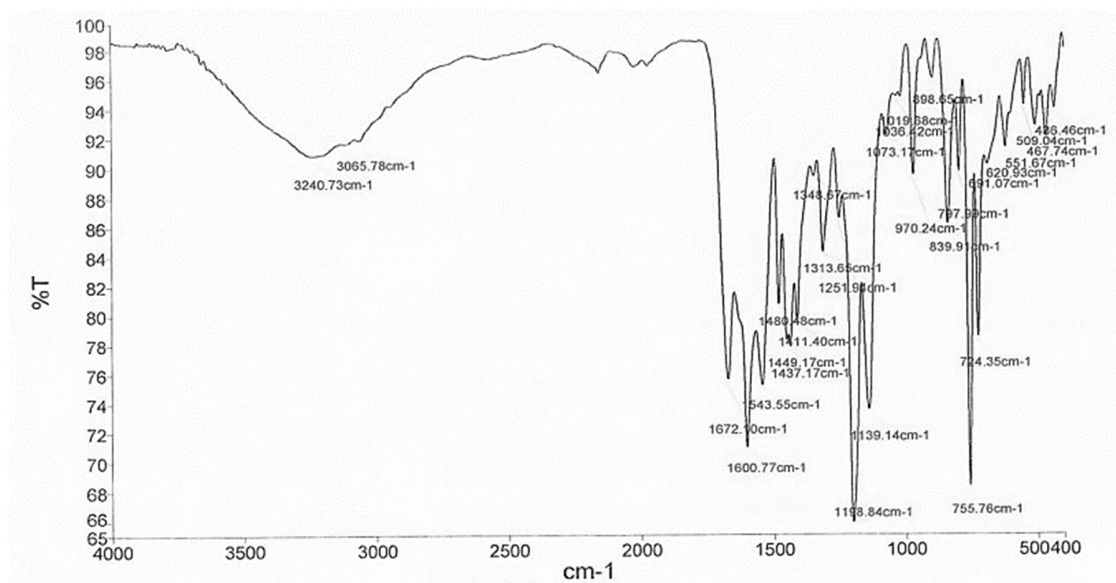

**Figure S8.** FTIR spectrum of compound CoL.

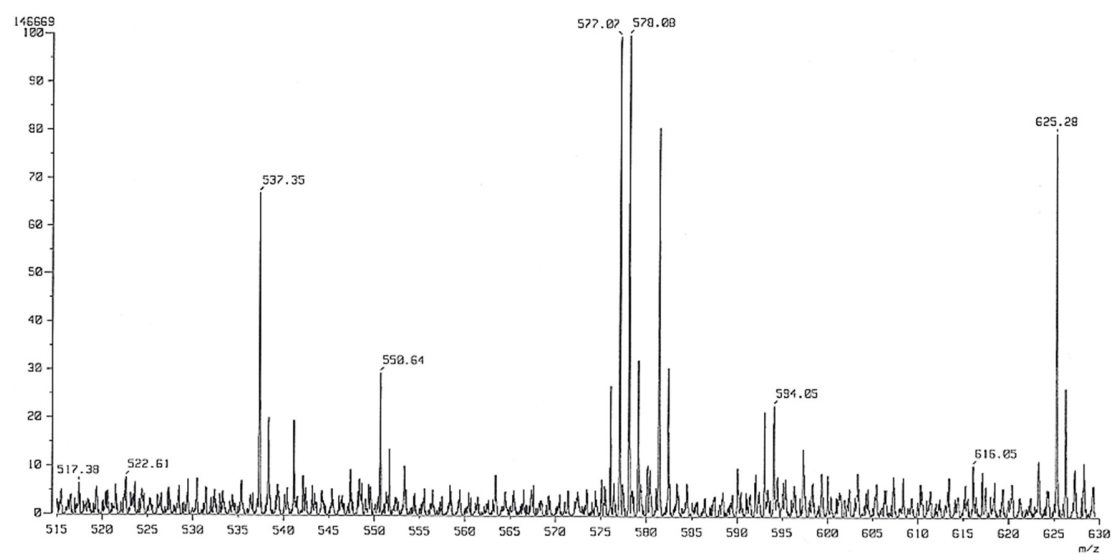

**Figure S9.** High-resolution FAB mass spectrum of compound CoL. Mass spectrum of main peak display parent ion (m/z): calcd, 577.0745 [M]<sup>+</sup> and 578.0823 [M+H]<sup>+</sup>; found, 577.0749 [M]<sup>+</sup> and 578.0820 [M+H]<sup>+</sup>.

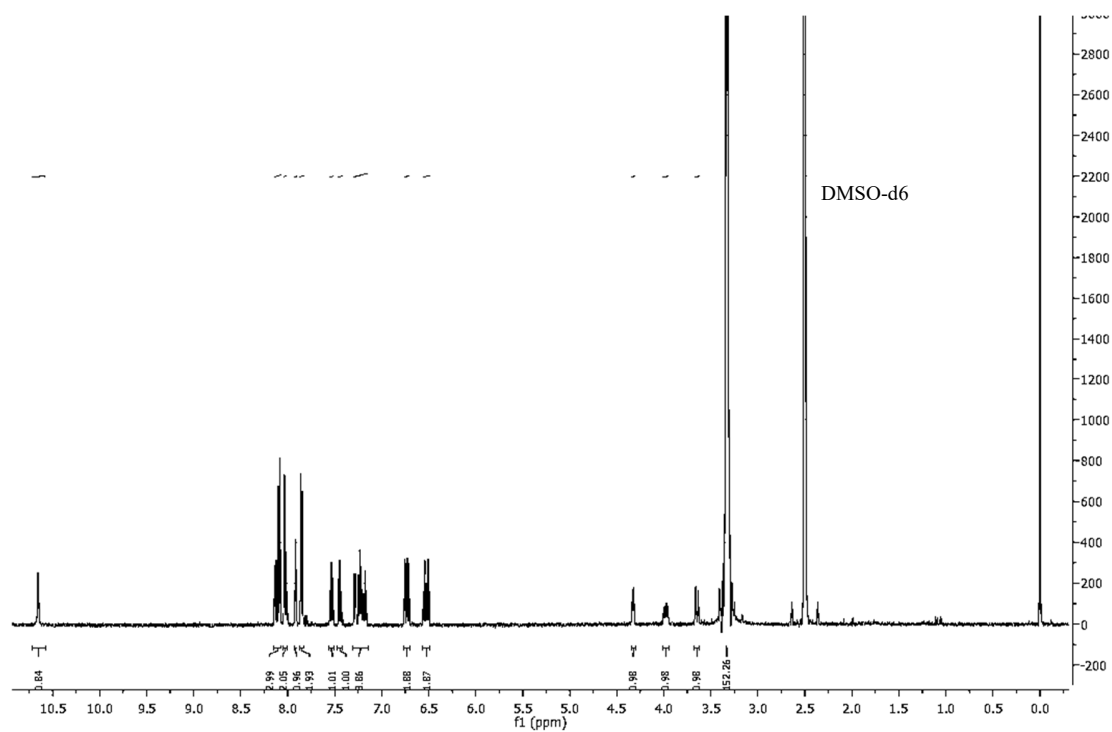

**Figure S10.** <sup>1</sup>H NMR spectrum of compound NiL.

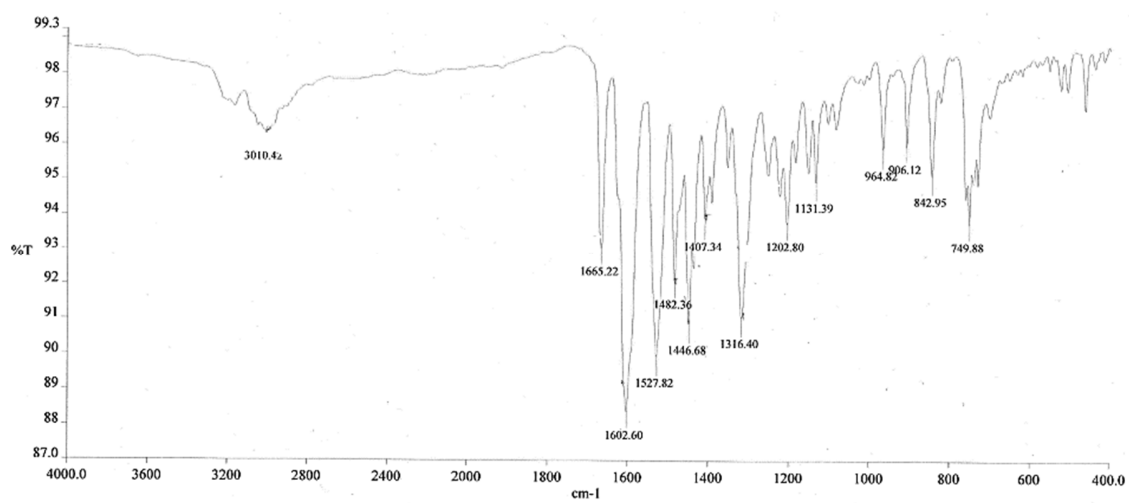

**Figure S11.** FTIR spectrum of compound NiL.

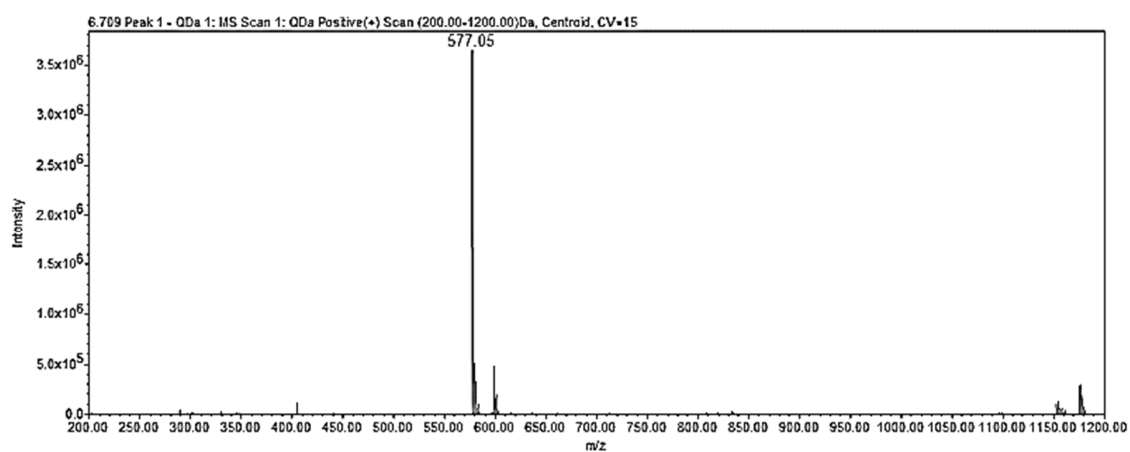

**Figure S12.** ESI-MS spectrum of compound NiL. Mass spectrum of main peak display parent ion (m/z): calcd, 577.08 [M+H]<sup>+</sup>; found, 577.05 [M+H]<sup>+</sup>.



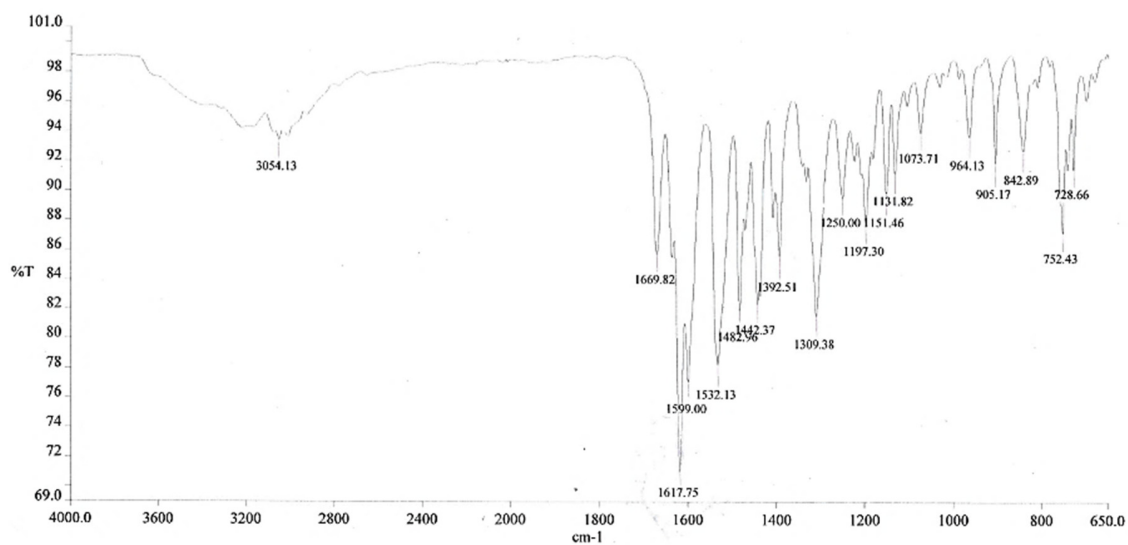

**Figure S13.** FTIR spectrum of compound CuL.

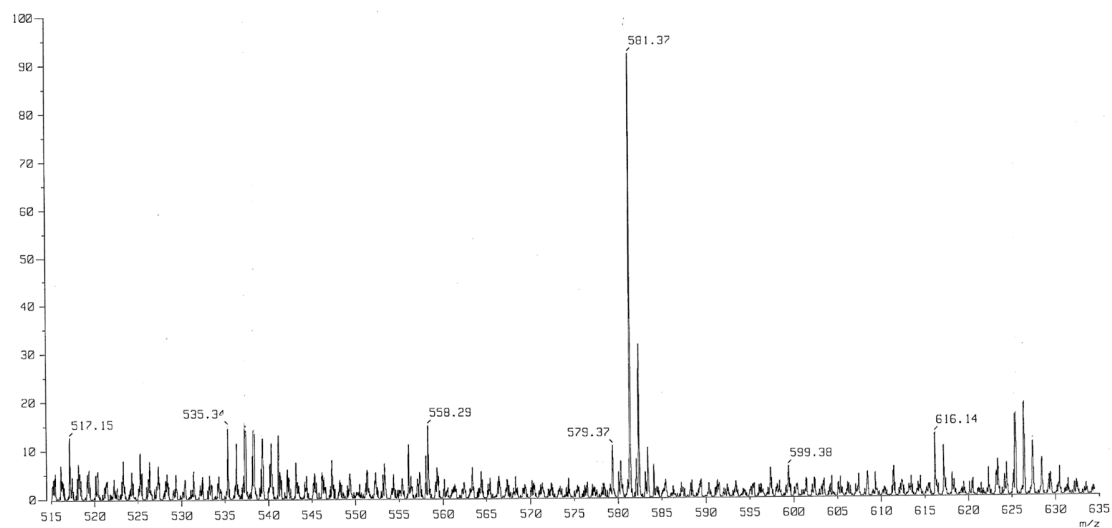

**Figure S14.** High-resolution FAB mass spectrum of compound CuL. Mass spectrum of main peak display parent ion (m/z): calcd, 581.0809 [M]<sup>+</sup>; found, 581.0709 [M]<sup>+</sup>.

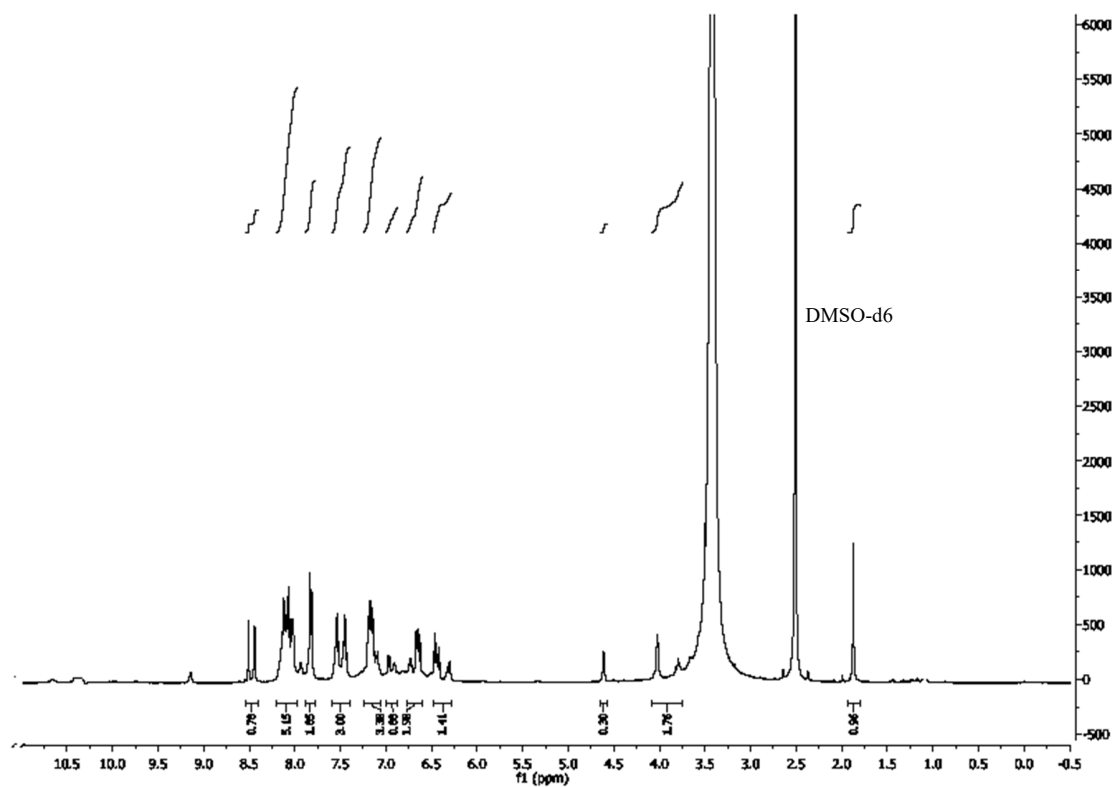

Figure S15.  $^1\text{H}$  NMR spectrum of compound ZnL.

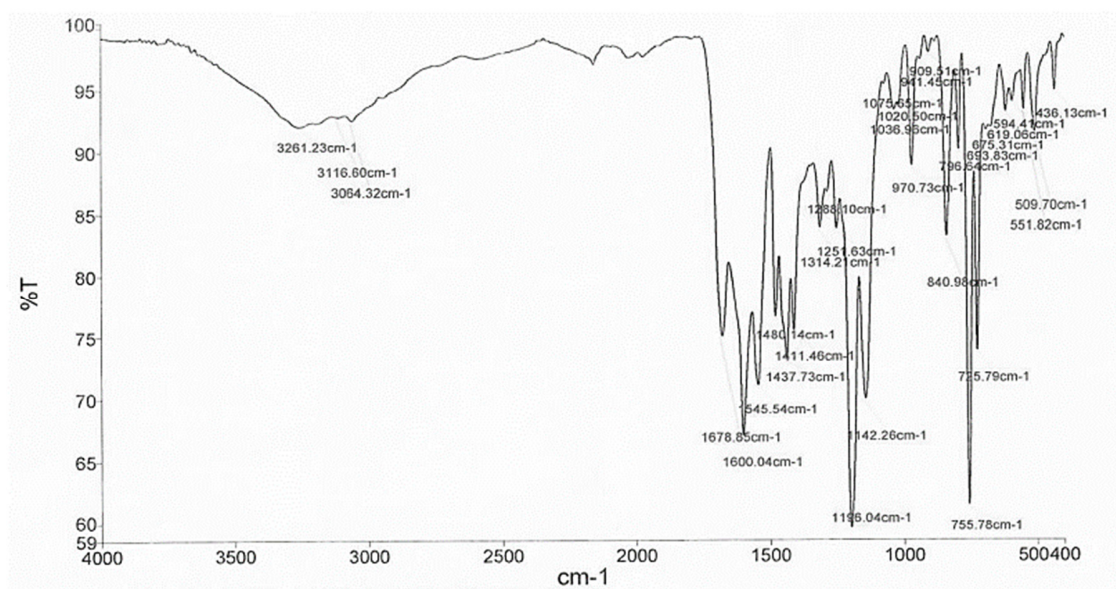

Figure S16. FTIR spectrum of compound ZnL.

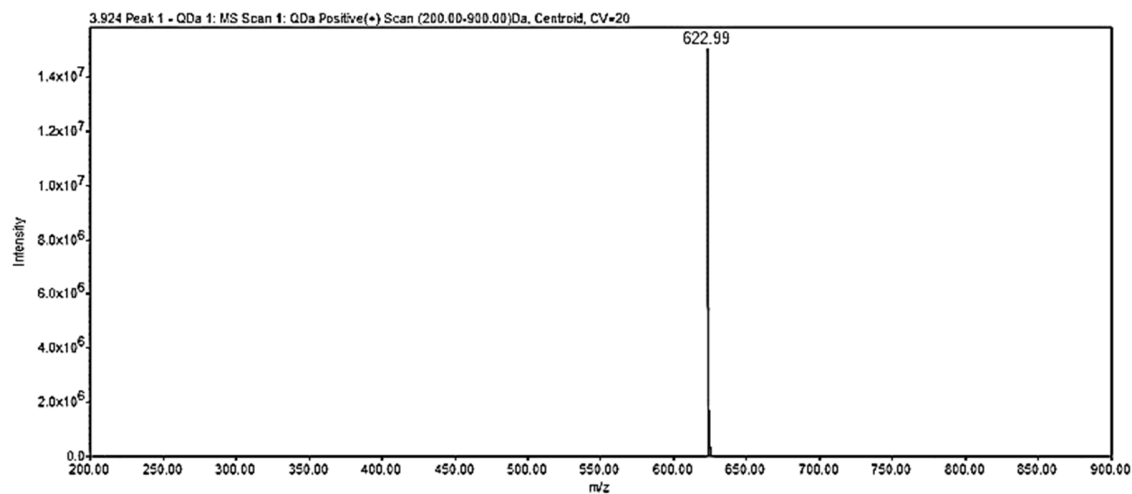

**Figure S17.** ESI-MS spectrum of compound **ZnL**. Mass spectrum of main peak display parent ion ( $m/z$ ): calcd, 622.04 [M+K]<sup>+</sup>; found, 622.99 [M+K]<sup>+</sup>.

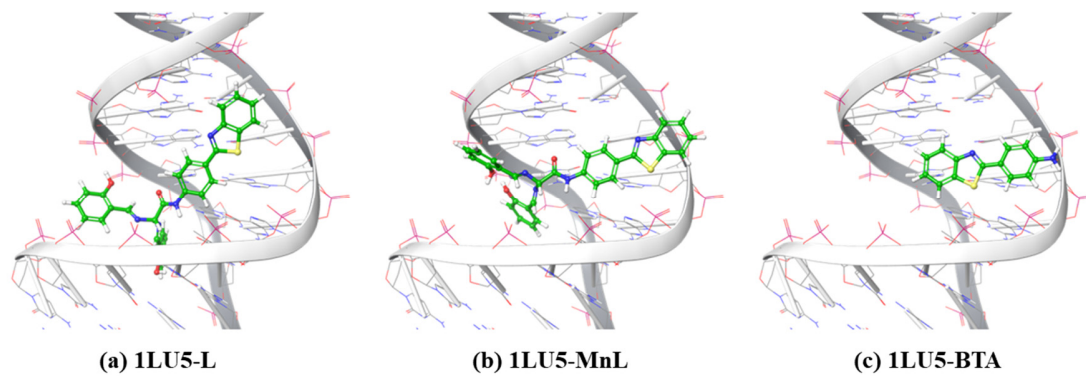

**Figure S18.** DNA binding configurations were predicted for the compounds (a) **L**, (b) **MnL**, and (c) **BTA** (PDB ID: 1LU5).

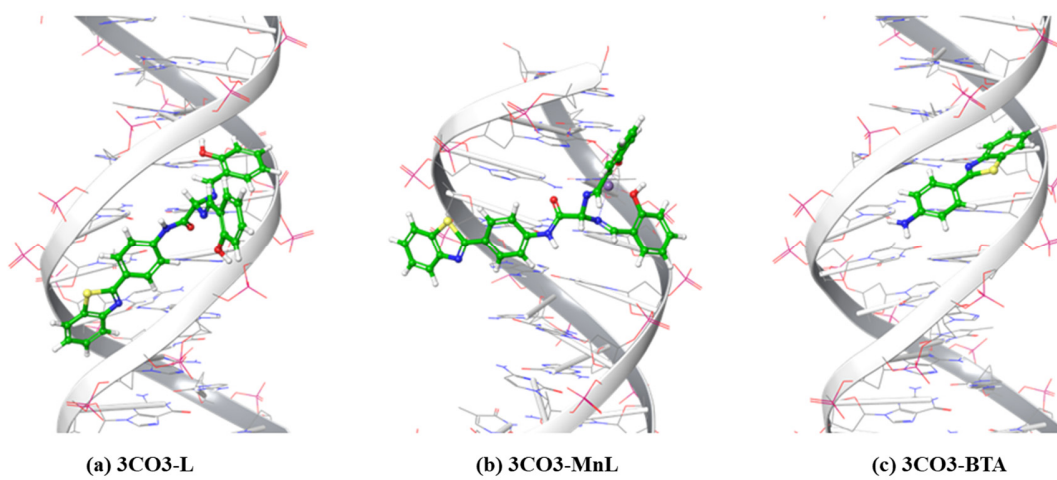

**Figure S19.** DNA binding configurations were predicted for the compounds (a) **L**, (b) **MnL**, and (c) **BTA** (PDB ID: 3CO3).
